# Supplementary material
Source: PubMed Central journal article supplement (PMC4560851)
Supplement: Supp_Figure1.pdf [file Supp_Figure1.pdf]

## Supplementary Data

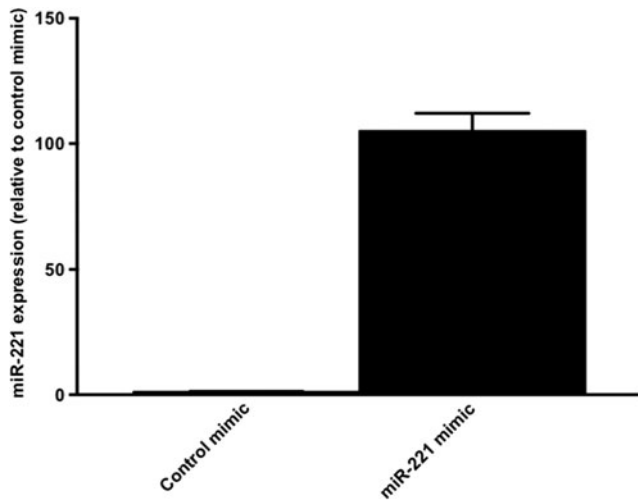

**SUPPLEMENTARY FIG. S1.** Transfection of myeloid dendritic cells (mDCs) with mirVana miR-221 mimic. Freshly isolated mDCs were rested for 1 h and then transfected with mirVana negative control mimic or miRNA-221 mimic. Bar graph indicates mean fold change in miR-221 expression (measured using TaqMan miR-221 qPCR Assay) in mDCs transfected with miR-221 mimic relative to negative control 24 h post-transfection. Error bars represent standard deviation ( $n=3$ ).
