# Supplementary material
Source: PubMed Central journal article supplement (PMC4560851)
Supplement: Supp_Figure2.pdf [file Supp_Figure2.pdf]

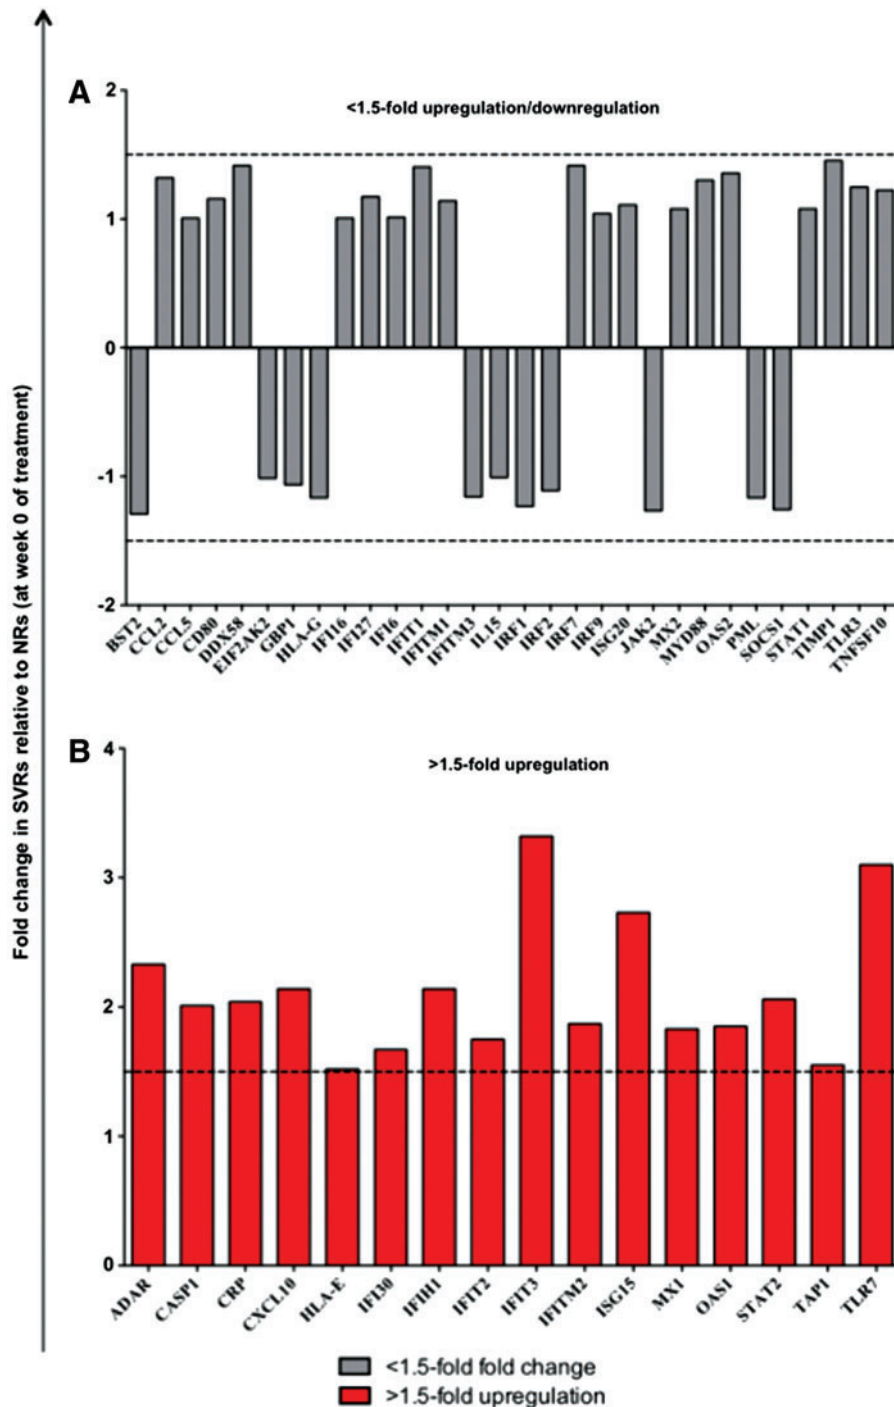

**SUPPLEMENTARY FIG. S2.** Expression profiling of type I interferon (IFN)-associated genes in non-responders (NRs) and sustained virological responders (SVRs) at week 0 of IFN/Ribavirin treatment. Cells-to-Ct lysate (using components supplied with power SYBR green cells-to-Ct kit) was prepared from peripheral blood mononuclear cells (PBMCs) of NRs ( $n = 12$ ) and SVRs ( $n = 6$ ) at week 0 of treatment. The lysate prepared from each NR and SVR was pooled (equal volumes) in the respective groups and the expression of 84 genes associated with IFN response was measured (using SA Biosciences Type I IFN response qPCR array). **(A)** Bar graph indicating genes that have less than 1.5-fold change (upregulation/downregulation) in SVRs relative to NRs. **(B)** Bar graph indicating genes that have greater than 1.5-fold upregulation in SVRs relative to NRs. Please note that there are no genes that are greater than 1.5-fold downregulated in SVRs relative to NRs.
