# Supplementary material
Source: PubMed Central journal article supplement (PMC4560851)
Supplement: Supp_Figure3.pdf [file Supp_Figure3.pdf]

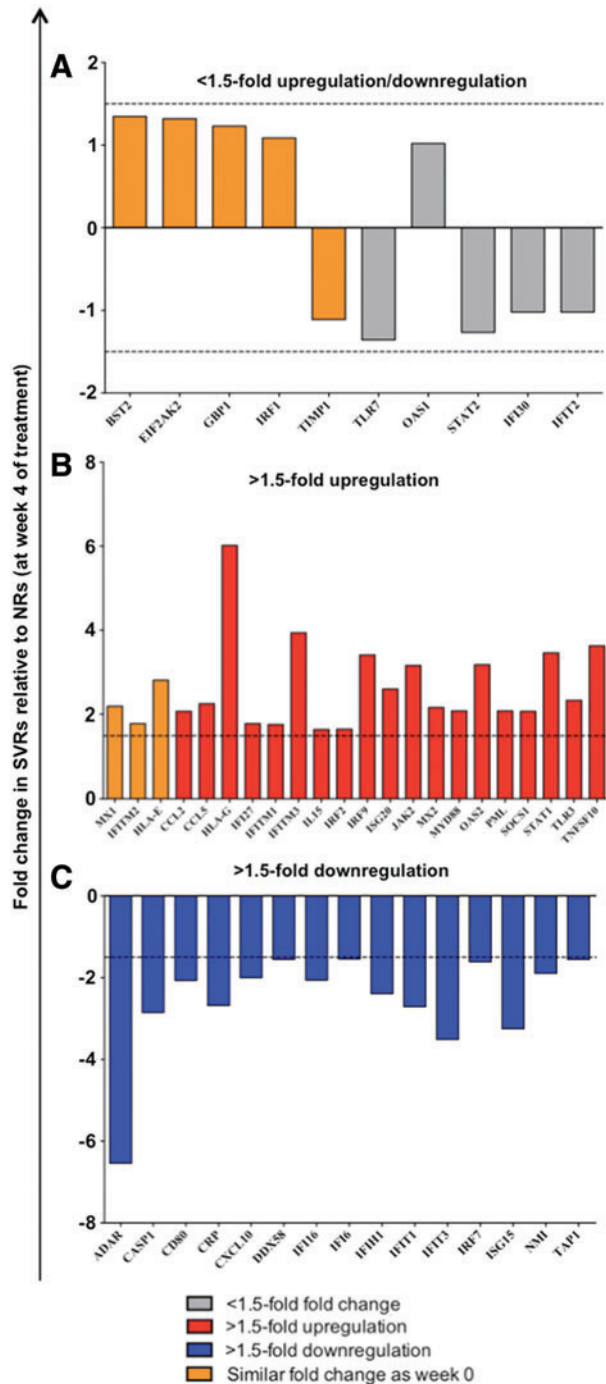

**SUPPLEMENTARY FIG. S3.** Expression profiling of type I IFN-associated genes in NRs and SVRs at week 4 of IFN/Ribavirin treatment. Cells-to-Ct lysate (using components supplied with power SYBR green cells-to-Ct kit) was prepared from PBMCs of NRs ( $n=12$ ) and SVRs ( $n=6$ ) at week 4 of treatment. The lysate prepared from each NR and SVR was pooled (equal volumes) in the respective groups and the expression of 84 genes associated with IFN response was measured (using SA Biosciences Type I IFN response qPCR array). (A) Bar graph indicating genes that have less than 1.5-fold change (upregulation/downregulation) in SVRs relative to NRs. (B) Bar graph indicating genes that have greater than 1.5-fold upregulation in SVRs relative to NRs. (C) Bar graph indicating genes that have greater than 1.5-fold downregulation in SVRs relative to NRs. Please note that *orange* bars represent genes, which have similar fold change as week 0.
