# Supplementary material
Source: PubMed Central journal article supplement (PMC4560851)
Supplement: Supp_Figure4.pdf [file Supp_Figure4.pdf]

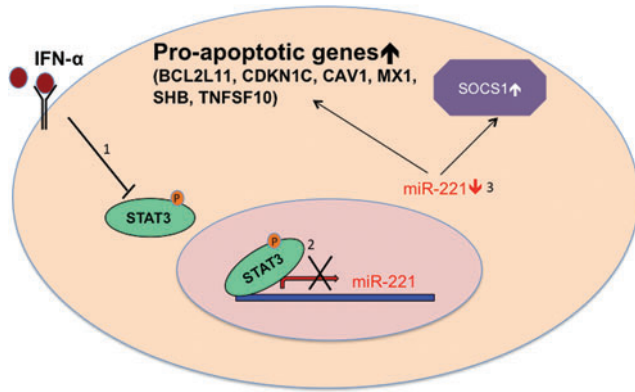

**SUPPLEMENTARY FIG. S4.** Model figure depicting our findings regarding IFN- $\alpha$ -induced miR-221 down-regulation and its relevance in mDC functionality. STAT3 drives miR-221 expression and is therefore required for maintaining basal miR-221 levels. Binding of IFN- $\alpha$  to its receptor, IFNAR, results in STAT3 inhibition, which leads to miR-221 downregulation. miR-221 targets BCL2L11 (proapoptotic protein), CDKN1C (proapoptotic protein), and SOCS1 (negative regulator of JAK/STAT signaling), thus regulating apoptosis and IL-6/TNF- $\alpha$  production in mDCs. miR-221 indirectly controls the expression of various other proapoptotic proteins, CAV1, MX1, SHB, and TNFSF10 as well.
