# Supplementary material
Source: PubMed Central journal article supplement (PMC4560851)
Supplement: Supp_Table3.pdf [file Supp_Table3.pdf]

SUPPLEMENTARY TABLE S3. HIV-1/HCV CO-INFECTED PATIENTS INVESTIGATED IN THE STUDY

| <i>Patient identification number</i> | <i>Gender</i> | <i>Race</i>      | <i>Age</i> | <i>HCV RNA (IU/mL)</i> | <i>Genotype</i> | <i>Treatment response</i> |
|--------------------------------------|---------------|------------------|------------|------------------------|-----------------|---------------------------|
| 300                                  | Male          | White            | 55         | 37,791                 | 3a              | SVR                       |
| 337                                  | Male          | African American | 44         | 50,872                 | 1a              | SVR                       |
| 529                                  | Male          | White            | 50         | 276,163                | 1a              | SVR                       |
| 598                                  | Male          | Hispanic         | 37         | 319,767                | 1a              | SVR                       |
| 746                                  | Male          | White            | 56         | 1,177,326              | 1a              | SVR                       |
| 791                                  | Male          | African American | 34         | 145,349                | 1a              | SVR                       |
| 134                                  | Male          | African American | 45         | 10,465,116             | 1b              | NR                        |
| 333                                  | Male          | White            | 48         | 5,087,209              | 1a              | NR                        |
| 425                                  | Female        | African American | 48         | 2,470,930              | 1a              | NR                        |
| 472                                  | Male          | White            | 40         | 8,430,233              | 1a              | NR                        |
| 538                                  | Male          | Hispanic         | 49         | 2,180,233              | 1b              | NR                        |
| 747                                  | Male          | African American | 48         | 4,796,512              | 1b              | NR                        |
| 748                                  | Male          | African American | 47         | 537,791                | 1a              | NR                        |
| 762                                  | Male          | African American | 47         | 1,744,186              | 1a              | NR                        |
| 821                                  | Male          | African American | 43         | 122,093                | 1a              | NR                        |
| 896                                  | Male          | African American | 47         | 1,395,349              | 1a              | NR                        |
| 926                                  | Male          | Hispanic         | 50         | 7,151,163              | 1b              | NR                        |
| 933                                  | Male          | White            | 40         | 209,302                | 1a              | NR                        |

SVRs, sustained virological responders; NRs, non-responders.
